# Supplementary material for: Population-Level Preparedness About Preventive Practices Against Coronavirus Disease 2019: A Cross-Sectional Study Among Adults in Bangladesh
Source: Frontiers journal article supplement (doi:10.3389/fpubh.2020.582701), 2021-01-11
Supplement: Data_Sheet_1.PDF [file Data_Sheet_1.PDF]

## Supplementary Tables

**STable 1. Items used to measure knowledge related to COVID-19**

| Knowledge related to COVID-19                                                                                                | n (%)             |                     |
|------------------------------------------------------------------------------------------------------------------------------|-------------------|---------------------|
|                                                                                                                              | Correct knowledge | Incorrect knowledge |
| <b>Knowledge about symptoms of COVID-19</b>                                                                                  |                   |                     |
| <b>Most common symptoms</b>                                                                                                  |                   |                     |
| Fever                                                                                                                        | 1022 (96.8)       | 34 (3.2)            |
| Dry cough                                                                                                                    | 1002 (94.9)       | 54 (5.1)            |
| Fatigue (tiredness)                                                                                                          | 697 (66.0)        | 359 (34.0)          |
| <b>Less common symptoms</b>                                                                                                  |                   |                     |
| Muscle or body aches and pains                                                                                               | 701 (66.4)        | 355 (33.6)          |
| Nasal congestion                                                                                                             | 718 (68.0)        | 338 (32.0)          |
| Sore throat                                                                                                                  | 1002 (94.9)       | 54 (5.1)            |
| Diarrhoea                                                                                                                    | 741 (70.2)        | 315 (29.8)          |
| Conjunctivitis                                                                                                               | 144 (13.6)        | 912 (86.4)          |
| Headaches                                                                                                                    | 616 (58.3)        | 440 (41.7)          |
| Loss of taste or smell                                                                                                       | 568 (53.8)        | 488 (46.2)          |
| A rash on the skin, or discoloration of fingers or toes                                                                      | 269 (25.5)        | 787 (74.5)          |
| <b>Serious symptoms</b>                                                                                                      |                   |                     |
| Shortness of breath                                                                                                          | 1026 (97.2)       | 30 (2.8)            |
| Chest pain or pressure                                                                                                       | 574 (54.4)        | 482 (45.6)          |
| Loss of speech or movement                                                                                                   | 60 (5.7)          | 996 (94.3)          |
| The novel Coronavirus can be asymptomatic                                                                                    | 973 (92.1)        | 83 (7.9)            |
| <b>Knowledge about treatment and vaccine of Coronavirus</b>                                                                  |                   |                     |
| There is no drug to treat the novel Coronavirus                                                                              | 772 (73.1)        | 284 (26.9)          |
| There is no vaccine for the novel Coronavirus                                                                                | 978 (92.6)        | 78 (7.4)            |
| <b>Knowledge about transmission and incubation period of Coronavirus</b>                                                     |                   |                     |
| The novel Coronavirus can be transmitted by animals to humans only                                                           | 270 (25.6)        | 786 (74.4)          |
| The novel Coronavirus is transmissible via droplets through coughing, sneezing or intimate contact                           | 1031 (97.6)       | 25 (2.4)            |
| The novel Coronavirus can remain alive for more than four hours                                                              | 640 (60.6)        | 416 (39.4)          |
| The novel Coronavirus can transmit during sexual intimacy                                                                    | 462 (43.8)        | 594 (56.3)          |
| The novel Coronavirus can transmit through papers and cartoons used in packing groceries/foods/packages that we order online | 817 (77.4)        | 239 (22.6)          |
| A Coronavirus infected person can be recovered from COVID-19                                                                 | 1010 (95.6)       | 46 (4.4)            |
| A recovered person be infected with Coronavirus again                                                                        | 859 (81.3)        | 197 (18.7)          |
| What is the incubation period of the novel coronavirus?                                                                      | 918 (86.9)        | 138 (13.1)          |
| <b>Average score for knowledge related to COVID-19 = 17.1 (SD = 3.10)</b>                                                    |                   |                     |

**STable 2. Items used to measure attitudes toward COVID-19**

| Statements                                                          | n (%)                             |            |                             |
|---------------------------------------------------------------------|-----------------------------------|------------|-----------------------------|
|                                                                     | Strongly disagree<br>and disagree | Neutral    | Agree and strongly<br>agree |
| Covid-19 is a human-made disease                                    | 443 (42.0)                        | 446 (42.2) | 167 (15.8)                  |
| Positive with the Novel Coronavirus means<br>death is definite      | 1018 (96.4)                       | 29 (2.7)   | 9 (0.9)                     |
| Covid-19 is a punishment from the creator                           | 473 (44.8)                        | 322 (30.5) | 261 (24.7)                  |
| Covid-19 does not attack Muslim people                              | 1035 (98.0)                       | 18 (1.7)   | 3 (0.3)                     |
| Non-Muslims are more prone to be infected by<br>this virus          | 948 (89.9)                        | 61 (5.8)   | 47 (4.5)                    |
| There is nothing called Coronavirus; it is just a<br>bad air        | 1024 (97.0)                       | 26 (2.5)   | 6 (0.6)                     |
| We can be safe if we pray to<br>Allah/God/Creator regularly         | 752 (71.2)                        | 193 (18.3) | 111 (10.5)                  |
| Coronavirus is created by Media                                     | 990 (93.8)                        | 51 (4.8)   | 15 (1.4)                    |
| <b>Average score for attitude toward COVID-19 = 13.7 (SD = 3.7)</b> |                                   |            |                             |

**STable 3. Items used to measure worriedness toward COVID-19**

| <b>Statements</b>                                                       | <b>Do not worry<br/>at all</b> | <b>Worry<br/>sometimes</b> | <b>Worry often</b> | <b>Worry all the<br/>time</b> |
|-------------------------------------------------------------------------|--------------------------------|----------------------------|--------------------|-------------------------------|
| Losing someone I love                                                   | 147 (13.9)                     | 387 (36.6)                 | 334 (31.6)         | 188 (17.8)                    |
| Own health                                                              | 185 (17.5)                     | 559 (52.9)                 | 236 (22.3)         | 76 (7.2)                      |
| Family member's health                                                  | 35 (3.3)                       | 351 (33.2)                 | 417 (39.5)         | 253 (24)                      |
| Not being able to pray in the mosque                                    | 531 (50.3)                     | 290 (27.5)                 | 166 (15.7)         | 69 (6.5)                      |
| Health system getting overloaded                                        | 58 (5.5)                       | 345 (32.7)                 | 433 (41)           | 220 (20.8)                    |
| Shut down of educational institutions                                   | 226 (21.4)                     | 339 (32.1)                 | 340 (32.2)         | 151 (14.3)                    |
| Economic recession                                                      | 21 (2)                         | 264 (25)                   | 438 (41.5)         | 333 (31.5)                    |
| Restricted access to food supplies                                      | 63 (6)                         | 370 (35)                   | 425 (40.2)         | 198 (18.8)                    |
| Society is getting more self-centered                                   | 212 (20.1)                     | 368 (34.8)                 | 317 (30)           | 159 (15.1)                    |
| Risk of famine                                                          | 91 (8.6)                       | 308 (29.2)                 | 379 (35.9)         | 278 (26.3)                    |
| <b>Average score for worriedness related COVID-19 = 25.5 (SD = 5.4)</b> |                                |                            |                    |                               |
